# Supplementary material for: A 3D-printed fully biocompatible supercapacitor
Source: Royal Society of Chemistry journal article supplement (doi:10.1039/d4ta02944e), 2024-01-01
Supplement: d4ta02944e4.pdf [file d4ta02944e4.pdf]

## Supporting information

### 3D-printed fully biocompatible supercapacitor

Chirag Mevada<sup>a</sup>, Jonne Tissari<sup>a</sup>, Vijay Singh Parihar<sup>b</sup>, Amit Tewari<sup>a</sup>, Jari Keskinen<sup>a</sup>, Minna Kellomäki<sup>b</sup>, Matti Mäntysalo<sup>a</sup>

<sup>a</sup>*Faculty of Information Technology and Communication Sciences, Tampere University, Tampere, Finland*

<sup>b</sup>*Faculty of Medicine and Health Technology, Tampere University, Tampere, Finland*

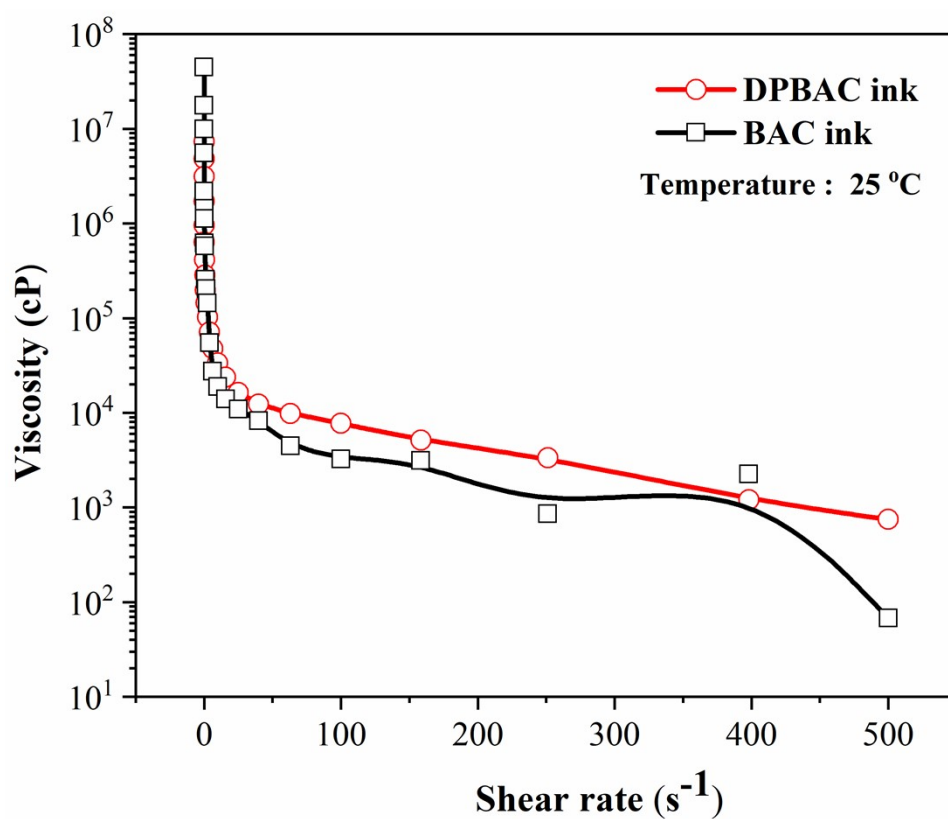

Fig. S1. Viscosity of a BAC and DPBAC inks as a function of shear rate

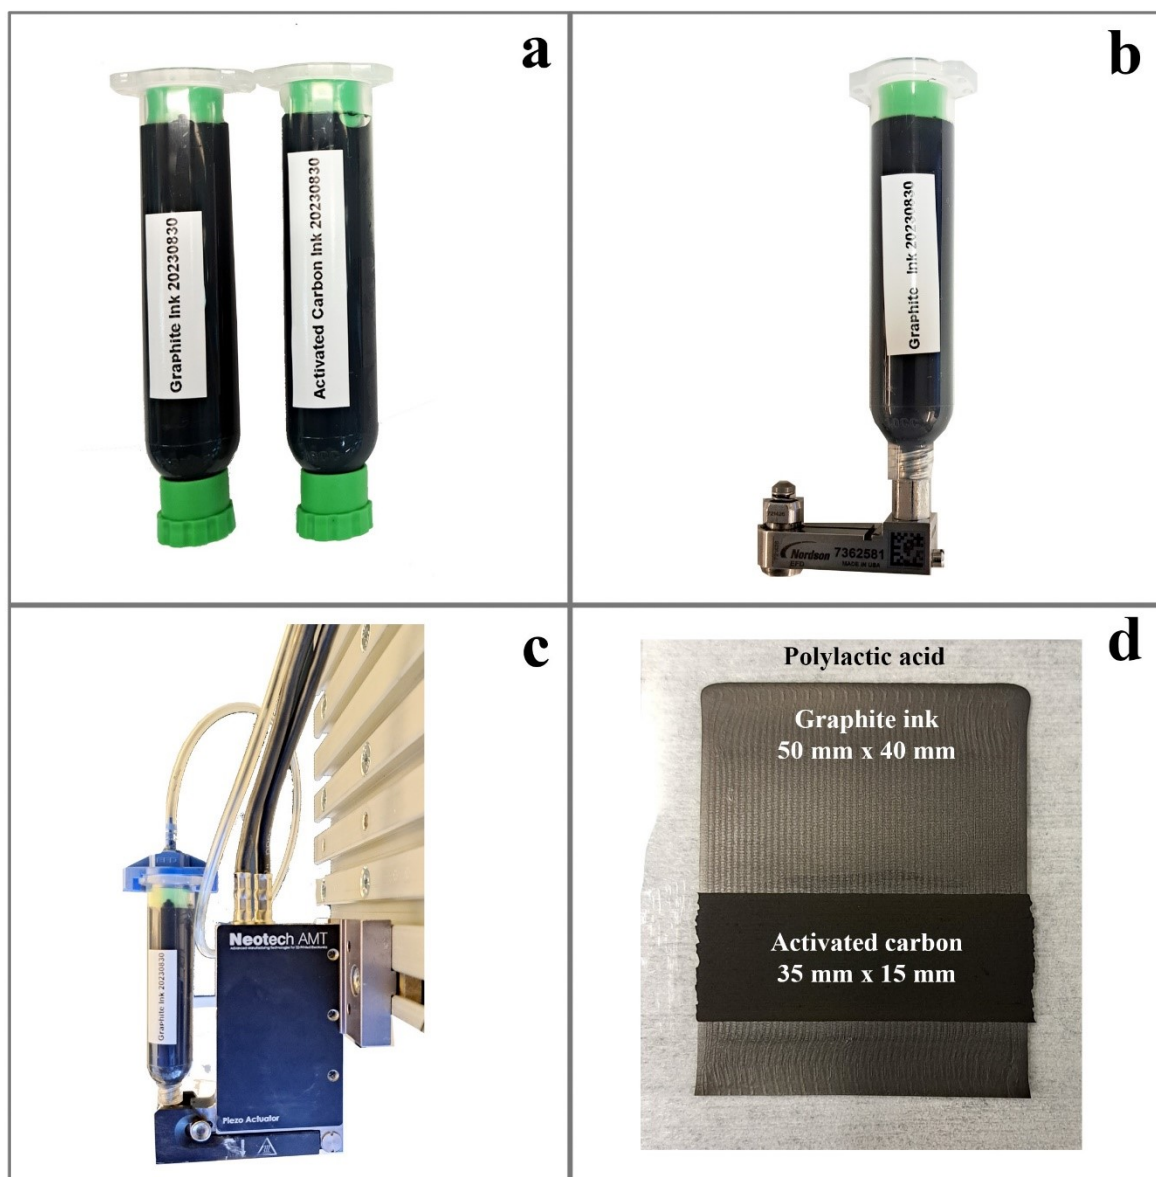

Fig. S2 Images of (a) graphite and activated carbon inks, (b) ink with a fluid body, (c) Piezo jet module fitted with ink, (d) printed graphite ink (current collector) and printed DPBAC (electrode) on polylactic acid (substrate)

### Substrate

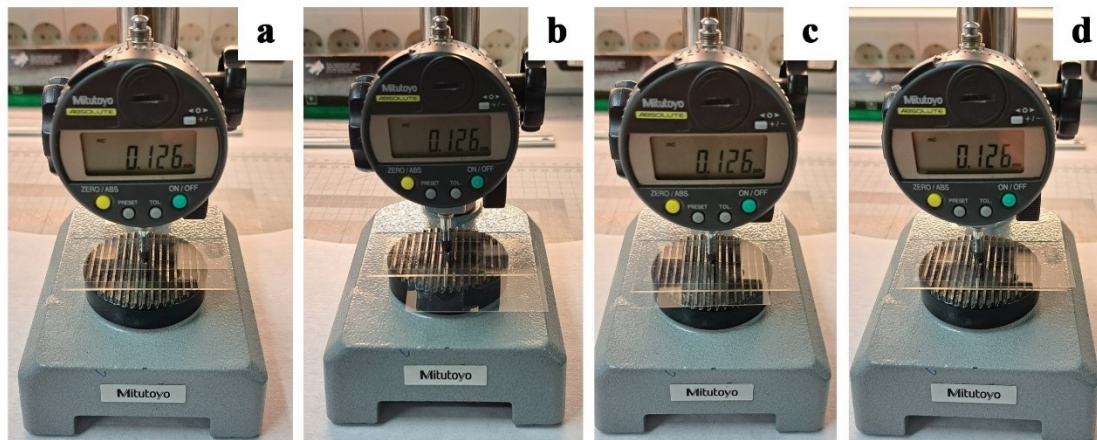

### Current Collector

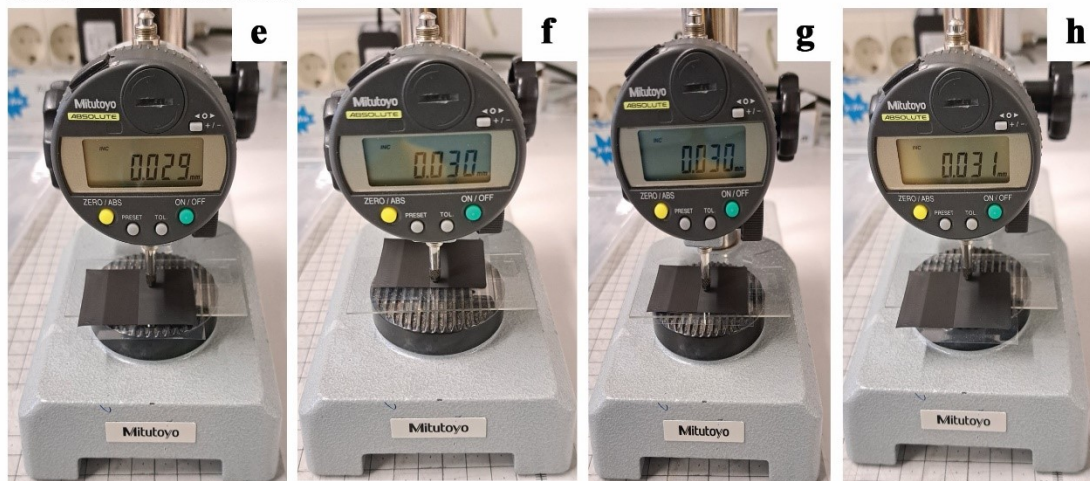

### Electrode

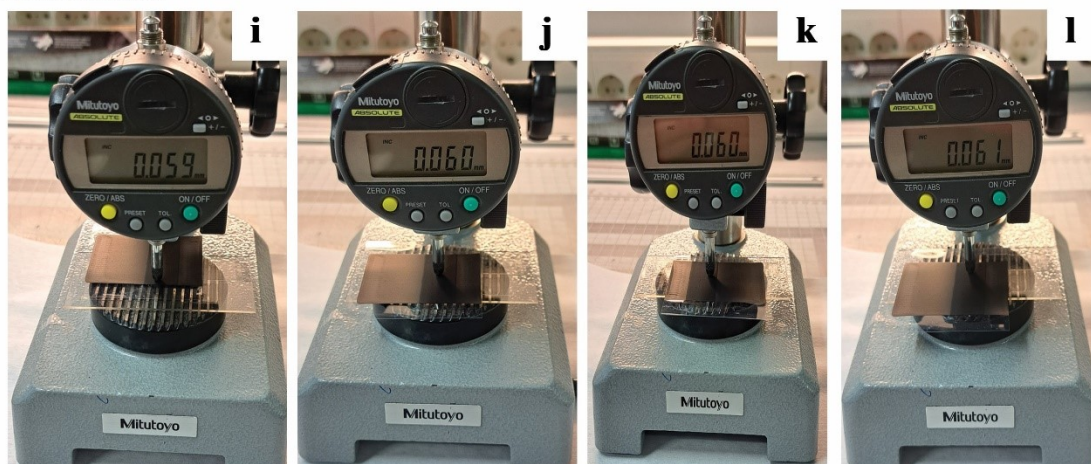

Fig. S3. Digital images of thickness measurements for the substrate (a-d), current collector (e-h), and electrode (i-l) taken at various points.

# Zeta Potential Report

v2.3

Malvern Instruments Ltd - © Copyright 2008

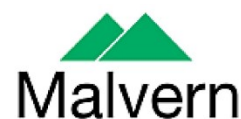

## Sample Details

Sample Name: BAC  
SOP Name: mansettings.nano  
General Notes:

File Name: Vijay.dts  
Record Number: 326  
Date and Time: Wednesday, 25 January 2023 17:....  
Dispersant Name: Water  
Dispersant RI: 1.330  
Viscosity (cP): 0.8872  
Dispersant Dielectric Constant: 78.5

## System

Temperature (°C): 25.0  
Count Rate (kcps): 146.6  
Cell Description: Clear disposable zeta cell  
Zeta Runs: 12  
Measurement Position (mm): 2.00  
Attenuator: 8

## Results

|                               | Mean (mV)     | Area (%) | St Dev (mV) |
|-------------------------------|---------------|----------|-------------|
| Zeta Potential (mV): -24.8    | Peak 1: -20.8 | 61.1     | 5.90        |
| Zeta Deviation (mV): 8.00     | Peak 2: -32.0 | 38.9     | 3.93        |
| Conductivity (mS/cm): 0.00628 | Peak 3: 0.00  | 0.0      | 0.00        |
| Result quality : Good         |               |          |             |

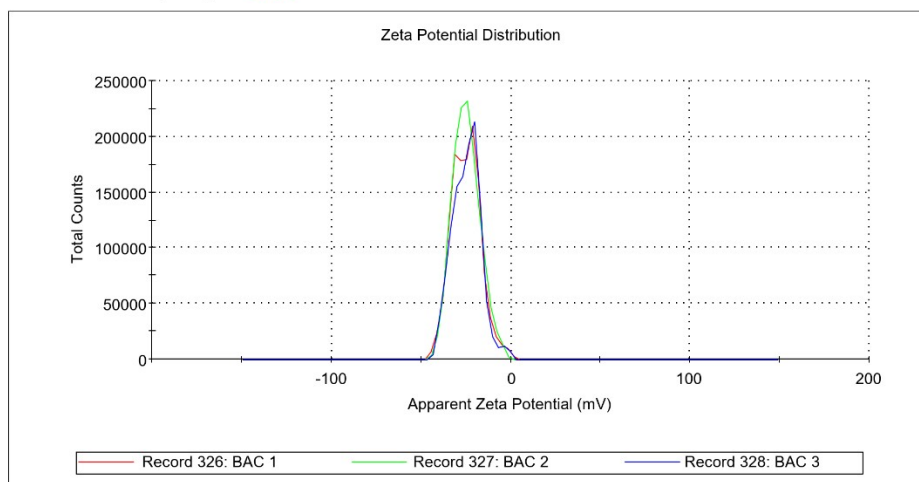

Fig. S4. Zeta potential of analysis of BAC



# Zeta Potential Report

v2.3

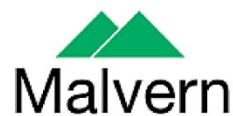

Malvern Instruments Ltd - © Copyright 2008

## Sample Details

Sample Name: DPBAC

SOP Name: mansettings.nano

General Notes:

File Name: Vijay.dts Dispersant Name: Water  
Record Number: 395 Dispersant RI: 1.330  
Date and Time: Saturday, 20 May 2023 14.33.22 Viscosity (cP): 0.8872  
Dispersant Dielectric Constant: 78.5

## System

Temperature (°C): 25.0 Zeta Runs: 12  
Count Rate (kcps): 145.9 Measurement Position (mm): 2.00  
Cell Description: Clear disposable zeta cell Attenuator: 7

## Results

|                                     | Mean (mV)            | Area (%) | St Dev (mV) |
|-------------------------------------|----------------------|----------|-------------|
| <b>Zeta Potential (mV): -13.6</b>   | <b>Peak 1: -13.6</b> | 100.0    | 10.5        |
| <b>Zeta Deviation (mV): 10.5</b>    | <b>Peak 2: 0.00</b>  | 0.0      | 0.00        |
| <b>Conductivity (mS/cm): 0.0149</b> | <b>Peak 3: 0.00</b>  | 0.0      | 0.00        |
| <b>Result quality : Good</b>        |                      |          |             |

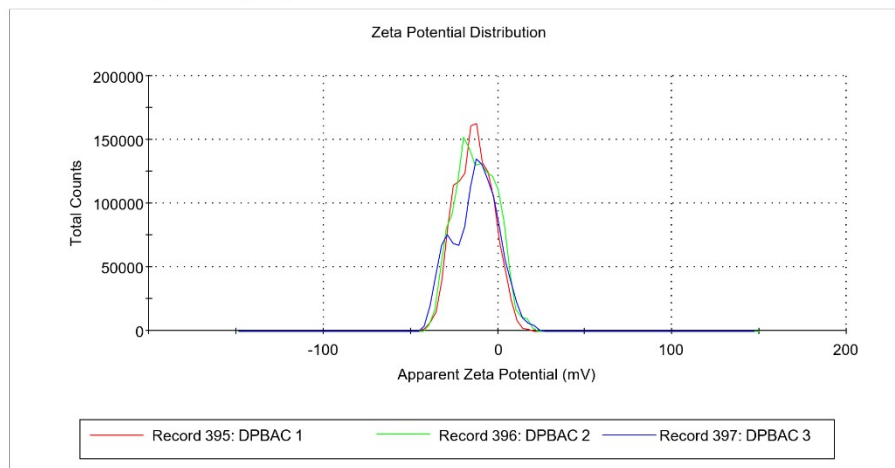

Fig. S5. Zeta potential of analysis of DPBAC

## Zeta Potential Report

v2.3

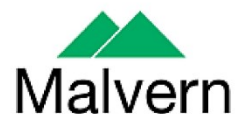

Malvern Instruments Ltd - © Copyright 2008

### Sample Details

**Sample Name:** Dopamine hydrochloride

**SOP Name:** mansettings.nano

**General Notes:**

|                                                      |                                             |
|------------------------------------------------------|---------------------------------------------|
| <b>File Name:</b> Vijay.dts                          | <b>Dispersant Name:</b> Water               |
| <b>Record Number:</b> 403                            | <b>Dispersant RI:</b> 1.330                 |
| <b>Date and Time:</b> Saturday, 20 May 2023 15.02.03 | <b>Viscosity (cP):</b> 0.8872               |
|                                                      | <b>Dispersant Dielectric Constant:</b> 78.5 |

### System

|                                                     |                                        |
|-----------------------------------------------------|----------------------------------------|
| <b>Temperature (°C):</b> 25.0                       | <b>Zeta Runs:</b> 15                   |
| <b>Count Rate (kcps):</b> 480.9                     | <b>Measurement Position (mm):</b> 2.00 |
| <b>Cell Description:</b> Clear disposable zeta cell | <b>Attenuator:</b> 11                  |

### Results

|                                    | Mean (mV)           | Area (%) | St Dev (mV) |
|------------------------------------|---------------------|----------|-------------|
| <b>Zeta Potential (mV):</b> 5.29   | <b>Peak 1:</b> 5.29 | 100.0    | 9.33        |
| <b>Zeta Deviation (mV):</b> 9.33   | <b>Peak 2:</b> 0.00 | 0.0      | 0.00        |
| <b>Conductivity (mS/cm):</b> 0.585 | <b>Peak 3:</b> 0.00 | 0.0      | 0.00        |
| <b>Result quality:</b> Good        |                     |          |             |

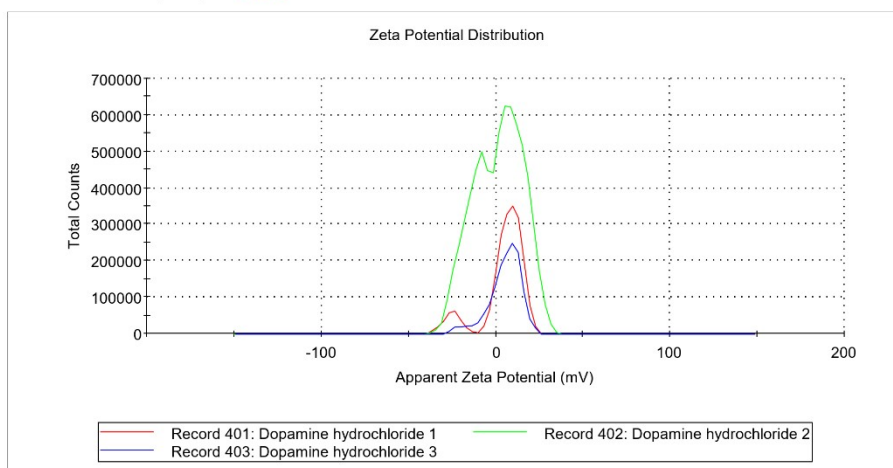

Fig. S6. Zeta potential of analysis of dopamine hydrochloride

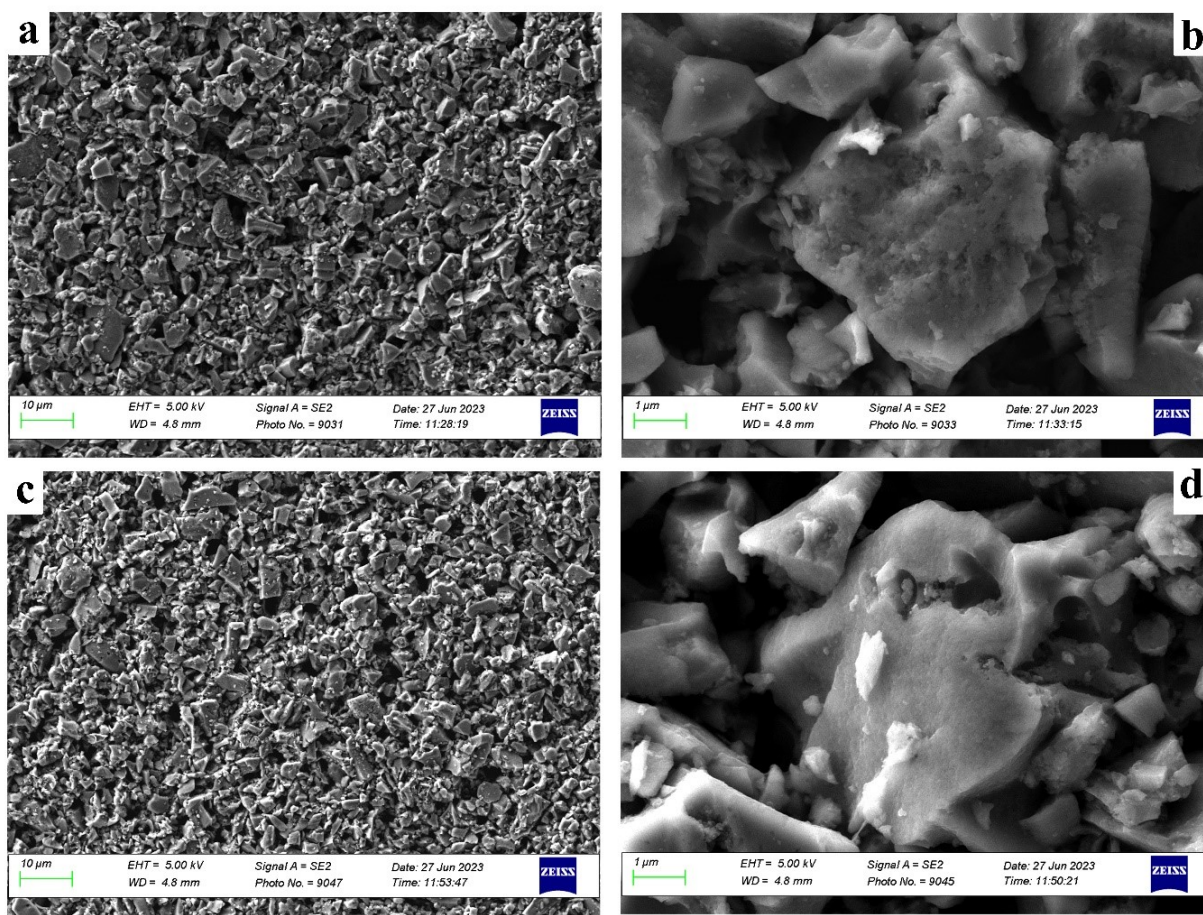

Fig. S7. FE-SEM images of (a) BAC, (b) zoomed-in view of sample a, (c) DPBAC and (d) zoomed-in view of sample c.

### Comparison of electrochemical performance of aqueous electrolyte versus Reline

To investigate the impact of Reline electrolyte, the electrochemical performance of Reline was compared with an aqueous electrolyte (NaCl:Water:1:5 wt.%), known for its safety compared to conventional electrolytes like  $\text{H}_2\text{SO}_4$  or KOH. It is noteworthy that Reline can achieve a higher voltage window of up to 2.0 V, whereas the aqueous electrolyte is limited to 1.2 V due to water decomposition. To facilitate a meaningful comparison, three SCs connected in series for the aqueous electrolyte (NaCl:Water: 1:5 wt.%) and two SCs in series for the Reline-based SCs using conductive copper tape. The CV and GCD curves for the fabricated SCs were recorded, and the results are displayed in Fig. 8a and 8b. The maximum specific capacitance achieved through GCD measurements was  $11.8 \text{ F g}^{-1}$  at a current density of  $0.02 \text{ A g}^{-1}$  for Reline (2 SCs in series), which significantly surpassed the  $5.9 \text{ F g}^{-1}$  capacitance observed for the SCs fabricated with the aqueous electrolyte (3 SCs in series).

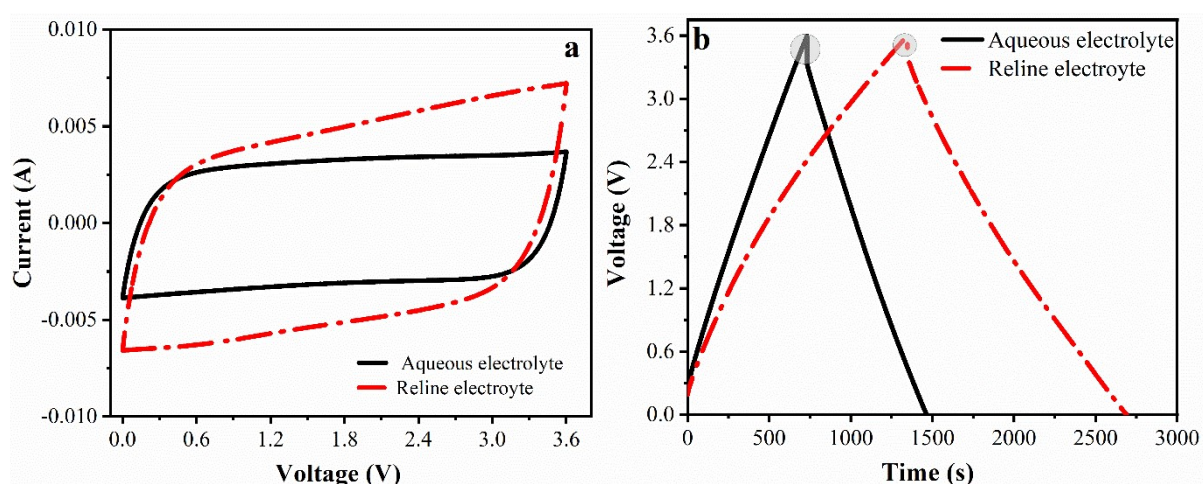

Fig. S8 Comparison of (a) CV recorded at a scan rate of  $5 \text{ mVs}^{-1}$  and (b) GCD curves recorded at a constant current of  $0.06 \text{ A g}^{-1}$  for supercapacitors fabricated using two different electrolytes: aqueous electrolyte and Reline.
